# Supplementary material
Source: PubMed Central journal article supplement (PMC7611015)

supplementary figure 1

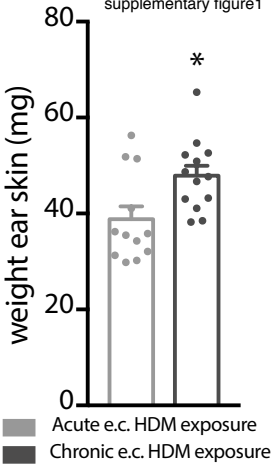

supplementary figure 2

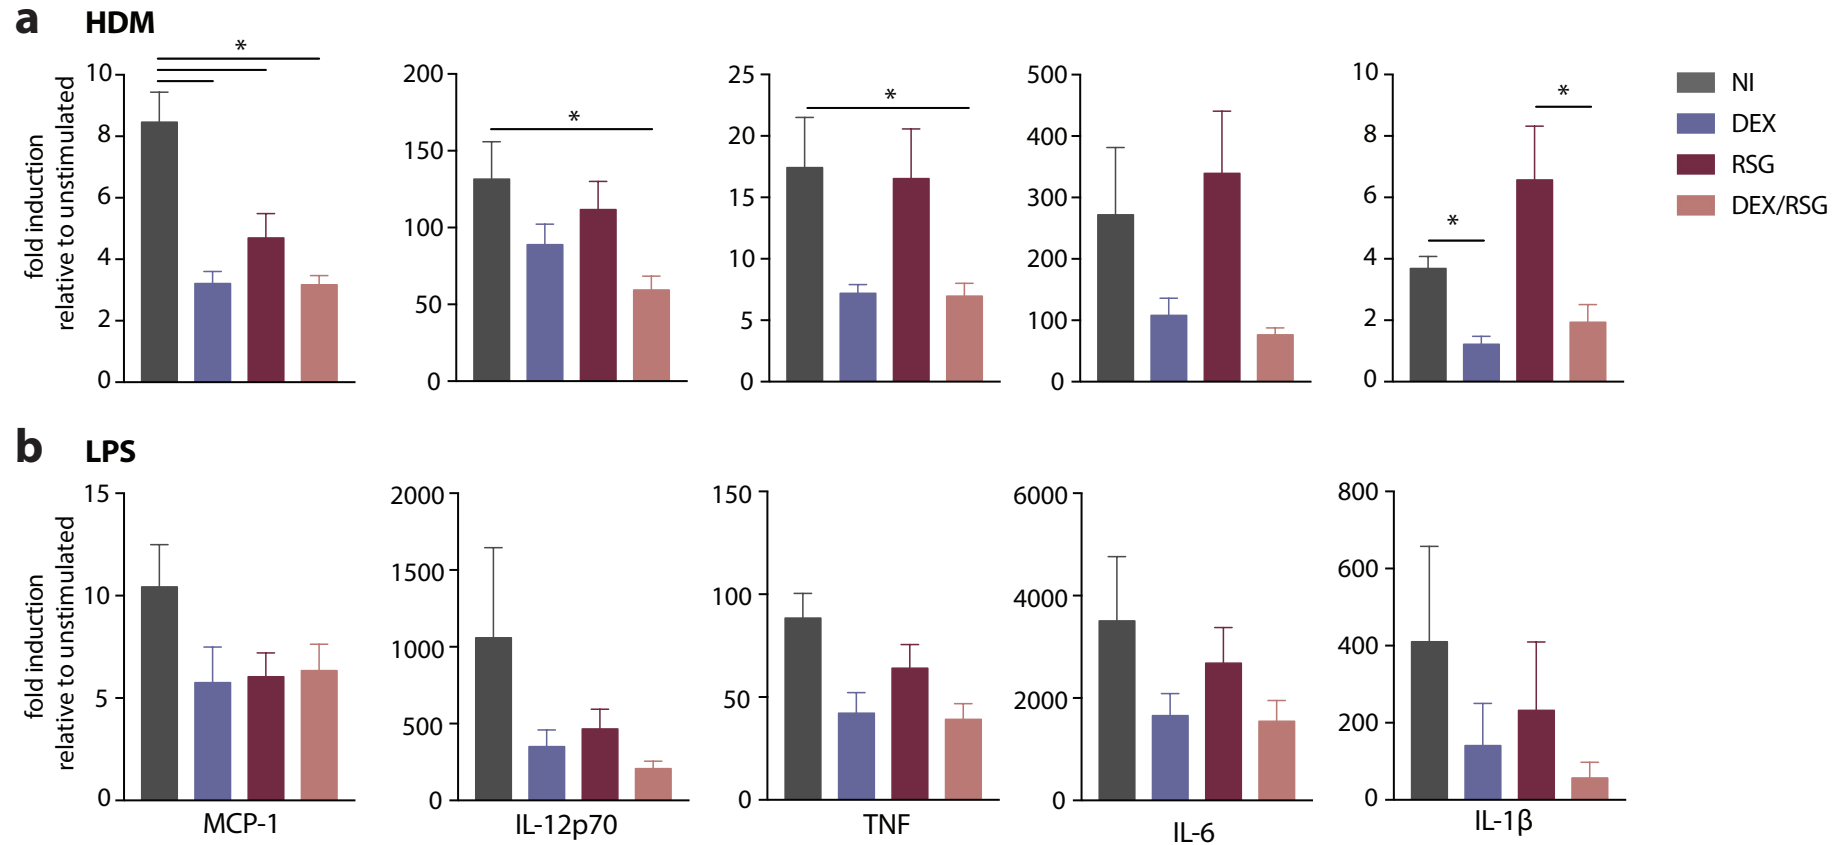

**a**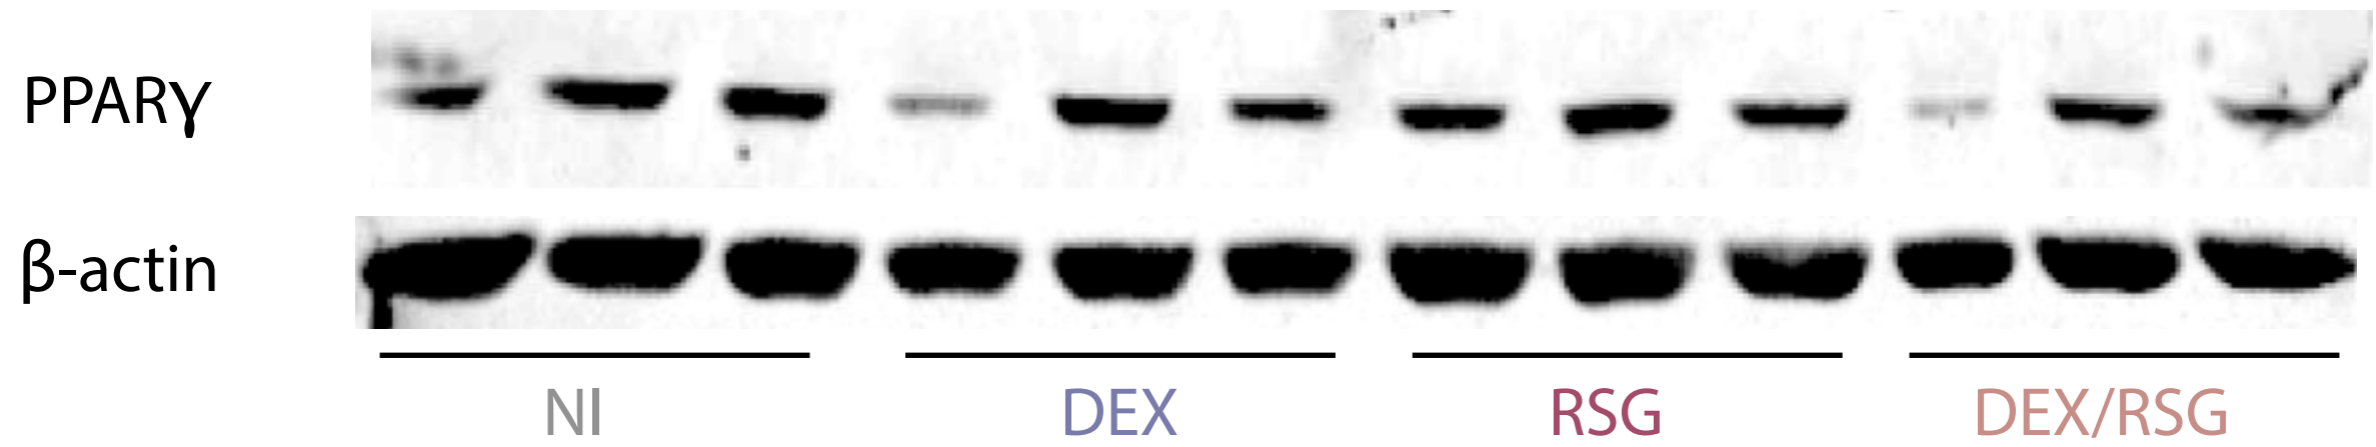**b**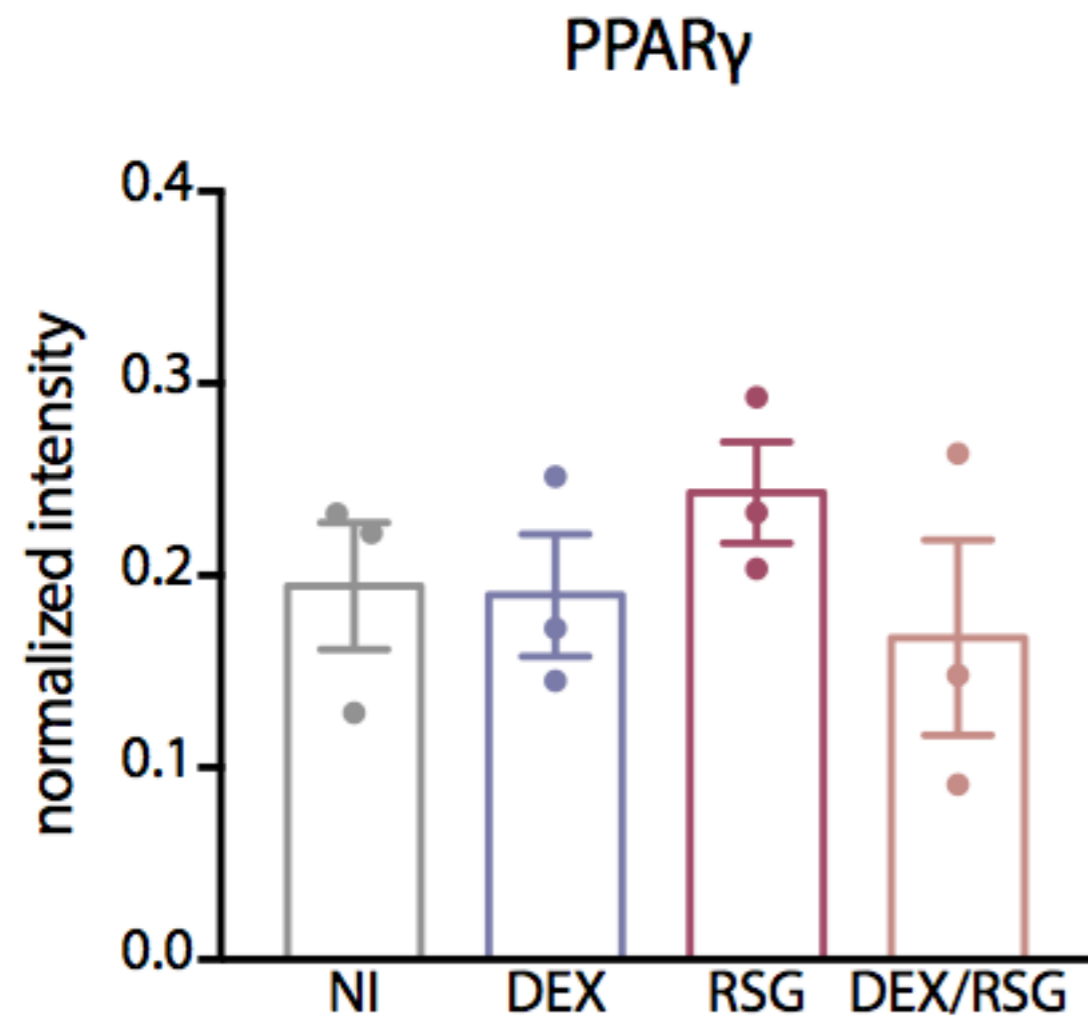

Supplement: EMS123720-supplement-Supplementary_Material.pdf [file EMS123720-supplement-Supplementary_Material.pdf]
